# Supplementary material for: Robust detection of clinically relevant features in single-cell RNA profiles of patient-matched fresh and formalin-fixed paraffin-embedded (FFPE) lung cancer tissue
Source: PubMed Central journal article supplement (PMC11322409; doi:10.1007/s13402-024-00922-0), 2024-02-01
Supplement: 13402_2024_922_MOESM2_ESM.pdf [file 13402_2024_922_MOESM2_ESM.pdf]

## **Supplementary Method: Processing of FFPE tissue samples for single-nuclei RNA sequencing**

### **Robust detection of clinically relevant features in single-cell RNA profiles of patient-matched fresh and formalin-fixed paraffin-embedded (FFPE) lung cancer tissue**

Alexandra Trinks<sup>1</sup>, Miha Milek<sup>2</sup>, Dieter Beule<sup>2</sup>, Julie Kluge<sup>3</sup>, Stefan Florian<sup>3,4</sup>, Christine Sers<sup>3,5</sup>, David Horst<sup>3,5</sup>, Markus Morkel<sup>1,3,5,\*</sup>, and Philip Bischoff<sup>3,4,5,\*</sup>

Affiliations:

- 1) Berlin Institute of Health at Charité – Universitätsmedizin Berlin, Bioportal Single Cells, Berlin, Germany
- 2) Berlin Institute of Health at Charité – Universitätsmedizin Berlin, Core Unit Bioinformatics (CUBI), Berlin, Germany
- 3) Charité – Universitätsmedizin Berlin, Corporate Member of Freie Universität Berlin and Humboldt-Universität zu Berlin, Institute of Pathology, Berlin, Germany
- 4) Berlin Institute of Health at Charité – Universitätsmedizin Berlin, BIH Biomedical Innovation Academy, BIH Charité Clinician Scientist Program, Berlin, Germany
- 5) German Cancer Consortium (DKTK) Partner Site Berlin, German Cancer Research Center (DKFZ), Heidelberg, Germany

\* equal contribution

Preface:

This protocol is based on the demonstrated protocol “Isolating Cells from FFPE Tissue Sections for Chromium Fixed RNA Profiling” version CG000606\_Rev B from 10X Genomics. Additional modifications have been adopted from Vallejo, A. F. et al. “snPATHO-seq: unlocking the FFPE archives for single nucleus RNA profiling.” bioRxiv 2022.08.23.505054 (2022) doi:10.1101/2022.08.23.505054. These include passing the sample through a 25G needle during dissociation and the optional FACS sorting step for debris removal.

## 1. Materials and Reagents

| Equipment/Material                       | Company                              |
|------------------------------------------|--------------------------------------|
| S2 sterile hood                          | Any vendor                           |
| FACS Cell Sorter                         | BD Aria or equivalent                |
| Flourescent Microscope                   | Any vendor                           |
| Microtom (for FFPE slices)               | Any vendor                           |
| Biopsy punch 1mm (for FFPE punches)      | Pfm medical, 49101                   |
| Pipets                                   | Any vendor                           |
| Pipet tips (10, 200, 1000µl)             | Any vendor                           |
| GentleMACS Dissociator                   | MACS, 130-096-427                    |
| 1.5ml Benchtop-Centrifuge                | Eppendorf, 5415R or equivalent       |
| 15/50ml Centrifuge                       | Heraeus, Multifuge X3R or equivalent |
| Neubauer Cell Count Chamber              | Any model                            |
| Heatblock at 42C, 1.5ml adapter          | Any vendor                           |
| Heatblock at 65C, 2ml adapter            | Any vendor                           |
| Petri dish (5cm)                         | Corning Life Science or equivalent   |
| Reaction tubes (1.5ml)                   | Eppendorf LoBind, 0030108051         |
| Falcon tubes (50 ml)                     | Corning Life Science or equivalent   |
| Miltenyi C tubes (50ml)                  | Miltenyi, 130-096-334                |
| Miltenyi Cell strainer (100µm) for 1.5ml | Miltenyi, 130-110-917                |
| Miltenyi Cell strainer (20µm) for 1.5ml  | Miltenyi, 130-101-812                |
| Cell strainer (70um) for 50ml            | Corning, 431751                      |
| Cell strainer (40um) for 50ml            | Corning, 431750                      |
| Scalpel                                  | Any vendor                           |
| Forceps                                  | Any vendor                           |
| Serological Pipettes                     | Any vendor                           |
| Filter 0.22uM (for filtering buffers)    | Sarstedt, 83.1826.001                |
| Syringe 20ml                             | BD Plastipak, 300629                 |
| 20G or 25G needle                        | Sterican, 4665791                    |
| Round bottom tube with cell strainer cap | Becton Dickinson, 352235             |
| Ice Box                                  | Any vendor                           |
| Cool Rack, 1.5ml, 0.2ml                  | Any vendor                           |

| Reagent                                                     | Company                          |
|-------------------------------------------------------------|----------------------------------|
| Miltenyi FFPE kit, human                                    | Miltenyi, 130-118-052            |
| Xylene                                                      | Sigma Aldrich, 214736            |
| Ethanol absolute, 99%                                       | Merck, 11093.03                  |
| 1x PBS (1xDPBS, w/o CaCl <sub>2</sub> , MgCl <sub>2</sub> ) | Gibco, Thermo Fisher, #14190-094 |
| dH <sub>2</sub> O                                           | Biozym, 331705                   |
| 100% BSA (Albumin bovine Fraction V)                        | Serva, #11930                    |
| BSA, 10% Aqueous Solution, Nuc-Free                         | Sigma Aldrich, 126615            |
| Tris, pH 8                                                  | VWR, E199-100ML                  |
| RNase Inhibitor, cloned (40U µL <sup>-1</sup> )             | Ambion, AM2682                   |
| DAPI Staining Solution                                      | Miltenyi, 130-111-570            |
| 50% Glycerol                                                | BioVision, B1012-100             |
| SPRIselect beads                                            | Beckman Coulter, B23318          |
| 10% Tween 20                                                | Roche, 11332465001               |
| 10X 3'scRNA Flex kit + Chip Q                               | 10X Genomics, diverse            |

## 2. Reagent Preparation

### Miltenyi FFPE Kit

#### **Enzyme D (~ 6 months at -20C)**

- dissolve in 3ml sterile H<sub>2</sub>O, invert during 5-10min (no vortex)
- make 200ul aliquots
- store at -20C

#### **Enzyme G (~ 6 months at -20C)**

- dissolve in 3ml sterile H<sub>2</sub>O, invert during 5-10min (no vortex)
- make 200ul aliquots
- store at -20C

## 3. Buffer Preparation

### **De-paraffining per sample**

| Reagent          | Stock Conc | Final Conc | Reagent (ml) | H <sub>2</sub> O (ml) | Final Volume |
|------------------|------------|------------|--------------|-----------------------|--------------|
| Xylene           | 100%       | 100%       | 9ml          | -                     | 9ml          |
| Ethanol          | 100%       | 100%       | 4ml          | -                     | 4ml          |
| Ethanol          | 100%       | 70%        | 0.7ml        | 0.3ml                 | 1ml          |
| Ethanol          | 100%       | 50%        | 0.5ml        | 0.5ml                 | 1ml          |
| H <sub>2</sub> O | 100%       | 100%       | 1ml          | -                     | 1ml          |
| Buffer V         | 100%       | 100%       | 1ml          | -                     | 1ml          |

### **Dissociation Buffer 2.5ml per sample (Miltenyi FFPE kit)**

| Reagent   | Stock Conc | Final Conc | Volume 1x | Volume 4x | Volume 8x |
|-----------|------------|------------|-----------|-----------|-----------|
| Buffer V  | -          | -          | 2.3ml     | 9.2ml     | 18.4ml    |
| Enzyme D  | -          | -          | 100ul     | 400ul     | 800ul     |
| Enzyme G  | -          | -          | 100ul     | 400ul     | 800ul     |
| Reagent A | -          | -          | 2.5ul     | 10ul      | 20ul      |

### **Resuspension Buffer 500ul per sample**

| Reagent          | Stock Conc | Final Conc | Volume 1x | Volume 4x | Volume 8x |
|------------------|------------|------------|-----------|-----------|-----------|
| PBS              | 1x         | 0.496x     | 248ul     | 992ul     | 1984ul    |
| Tris pH8         | 1M         | 50mM       | 25ul      | 100ul     | 200ul     |
| BSA              | 10%        | 0.02%      | 1ul       | 4ul       | 8ul       |
| RNase Inh        | 40U/ul     | 0.24U/ul   | 3ul       | 12ul      | 24ul      |
| H <sub>2</sub> O | -          | -          | 223ul     | 892ul     | 1784ul    |

### **10X Hyb-Mix 80ul per sample + 20ul individual barcode**

| Reagent      | Temperature              | Volume 1x          | Volume 4x          | Volume 8x          |
|--------------|--------------------------|--------------------|--------------------|--------------------|
| Hyb Buffer B | Thaw at 42C, keep warm   | 70ul               | 280ul              | 560                |
| Enhancer     | Thaw at 65C, keep at 42C | 10ul               | 40ul               | 80ul               |
| Incubate mix | 5min at 42C              | 80ul/sample        | 80ul/sample        | 80ul/sample        |
|              |                          | <b>+individual</b> | <b>+individual</b> | <b>+individual</b> |
| WTA Probes   | Thaw on ice, vortex      | 20ul               | 20ul               | 20ul               |

**10X Post-Hyb Wash Buffer 1.75ml per sample**

| Reagent     | Temperature              | Volume 1x | Volume 4x | Volume 8x |
|-------------|--------------------------|-----------|-----------|-----------|
| dH2O        | RT                       | 1.98ml    | 6.93ml    | 13.86ml   |
| Conc Buffer | Thaw at RT, keep on ice  | 110ul     | 385ul     | 770ul     |
| Enhancer    | Thaw at 65C, keep at 42C | 110ul     | 385ul     | 770ul     |

**10X Post-Hyb Resuspension Buffer 500ul for FACS**

| Reagent     | Temperature             | Volume 1x |
|-------------|-------------------------|-----------|
| dH2O        | RT                      | 523ul     |
| Conc Buffer | Thaw at RT, keep on ice | 27.5ul    |

**4. Procedure****Stage 1: FFPE Sample Collection**

- Select target area on FFPE block (ideally cell-rich) through inspection by a pathologist

**Punches:**

- o Use a biopsy punch to collect 1mm x 3mm punches in a petri dish
- o Remove visible paraffin and cut punches in smaller pieces using a scalpel
- o Transfer into a Miltenyi C-Tube

**Slices:**

- o Cut 50um thick slices using a microtome into a Miltenyi C-Tube
- o Number of slices depend on cell-richness

**Stage 2: De-paraffinization**

- Add the following reagents to the sample, incubate at RT, remove

| <b>Miltenyi C-Tube</b>               |         |
|--------------------------------------|---------|
| 3ml Xylene                           | – 10min |
| 3ml Xylene                           | – 10min |
| 3ml Xylene                           | – 10min |
| 3ml Ethanol 100%                     | – 1min  |
| 1ml Ethanol 100%                     | – 1min  |
| 1ml Ethanol 70%                      | – 1min  |
| 1ml Ethanol 50%                      | – 1min  |
| <b>Make sure paraffin is removed</b> |         |
| 1ml dH2O                             | – 1min  |
| 0.5ml Buffer V                       | – 1min  |

### **Stage 3: Nuclei Isolation**

- Prepare Dissociation Buffer and add 2.5ml to Miltenyi C-Tube

#### **Dissociation Buffer 2.5ml per sample (Miltenyi FFPE kit)**

| Reagent   | Stock Conc | Final Conc | Volume 1x | Volume 4x | Volume 8x |
|-----------|------------|------------|-----------|-----------|-----------|
| Buffer V  | -          | -          | 2.3ml     | 9.2ml     | 18.4ml    |
| Enzyme D  | -          | -          | 100ul     | 400ul     | 800ul     |
| Enzyme G  | -          | -          | 100ul     | 400ul     | 800ul     |
| Reagent A | -          | -          | 2.5ul     | 10ul      | 20ul      |

| Miltenyi C-Tube               |
|-------------------------------|
| GentleMacs                    |
| Run FFPE program with heaters |

#### **Turn on heat-blocks: 2ml block at 65C, 1.5ml block at 42C**

- Quick spin
- When solution is cloudy and punches are dissolved, use a 25G needle 10-15x to rupture tissue further into single cells; be gentle, avoid bubbles
- Pass solution through a 70um filter into a 50ml falcon
- Wash tube and filter with 1ml Buffer W
- Check nuclei under microscope and count; aim for 0.5-2million nuclei per sample
- Spin 5min at 850g at RT
- Remove supernatant without touching the pellet and resuspend in 500ul Resuspension Buffer

#### **Resuspension Buffer 500ul per sample**

| Reagent          | Stock Conc | Final Conc | Volume 1x | Volume 4x | Volume 8x |
|------------------|------------|------------|-----------|-----------|-----------|
| PBS              | 1x         | 0.496x     | 248ul     | 992ul     | 1984ul    |
| Tris pH8         | 1M         | 50mM       | 25ul      | 100ul     | 200ul     |
| BSA              | 10%        | 0.02%      | 1ul       | 4ul       | 8ul       |
| RNase Inh        | 40U/ul     | 0.24U/ul   | 3ul       | 12ul      | 24ul      |
| H <sub>2</sub> O | -          | -          | 223ul     | 892ul     | 1784ul    |

- Pass solution through a 20um filter (no flow-mi) into a low bind 1.5ml tube
- Spin 5min at 850g at RT

#### **Stage 4: Probe Hybridization**

- Heat up reagents and prepare 10X Hyb-Mix, incubate mix for 5min at 42C
- Thaw WTA Probes on ice, vortex, spin

#### **10X Hyb-Mix 80ul per sample + 20ul individual barcode**

| Reagent      | Temperature               | Volume 1x          | Volume 4x          | Volume 8x          |
|--------------|---------------------------|--------------------|--------------------|--------------------|
| Hyb Buffer B | Thaw at 42C, keep warm    | 70ul               | 280ul              | 560                |
| Enhancer     | 10min at 65C, keep at 42C | 10ul               | 40ul               | 80ul               |
|              |                           |                    |                    |                    |
| Incubate mix | 5min at 42C               | 80ul/sample        | 80ul/sample        | 80ul/sample        |
|              |                           | <b>+individual</b> | <b>+individual</b> | <b>+individual</b> |
| WTA Probes   | Thaw on ice, vortex, spin | 20ul               | 20ul               | 20ul               |

- Remove supernatant without touching the pellet and resuspend in 80ul 10X Hyb-Mix
- Add 20ul of individual WTA Probe
- Incubate 16-24h at 42C without shaking

#### **Stage 5: Post Hybridization Wash**

- Prepare reagents

| Reagent              | Temperature                           |
|----------------------|---------------------------------------|
| TL v1 Gel Beads      | Thaw at RT, vortex 30sec              |
| Reducing Agent       | Thaw at RT, vortex, spin              |
| Conc Post Hyb Buffer | Thaw at RT, keep on ice               |
| GEM Reagent Mix      | Thaw at RT, keep on ice, vortex, spin |
| GEM Enzyme Mix       | Keep at -20C until use, spin          |
| Enhancer             | Thaw at 65C, vortex, keep at 42C      |
| Partitioning Oil     | RT                                    |
| 50% Glycerol         | RT                                    |

- Prepare Post Hyb Wash Buffer and Post Hyb Resuspension Buffer

#### **10X Post-Hyb Wash Buffer 1.75ml per sample**

| Reagent     | Temperature              | Volume 1x | Volume 4x | Volume 8x |
|-------------|--------------------------|-----------|-----------|-----------|
| dH2O        | RT                       | 1.98ml    | 6.93ml    | 13.86ml   |
| Conc Buffer | Thaw at RT, keep on ice  | 110ul     | 385ul     | 770ul     |
| Enhancer    | Thaw at 65C, keep at 42C | 110ul     | 385ul     | 770ul     |

#### **10X Post-Hyb Resuspension Buffer 500ul for FACS**

| Reagent     | Temperature             | Volume 1x |
|-------------|-------------------------|-----------|
| dH2O        | RT                      | 523ul     |
| Conc Buffer | Thaw at RT, keep on ice | 27.5ul    |

- Add 750ul Post Hyb Wash Buffer to each sample
- Incubate 10min at 42C
- Spin 5min at 850g at RT
- Remove supernatant
- Add 500ul Post Hyb Wash Buffer to each sample
- Incubate 10min at 42C
- Spin 5min at 850g at RT
- Remove supernatant
- Add 500ul Post Hyb Wash Buffer to each sample
- Incubate 10min at 42C
- Transfer sample over a filter cap into a FACS tube

#### **Stage 6: FACS sort & Multiplexing**

- Proceed immediately to a FACS sorter

| Reagent                         | Temperature |
|---------------------------------|-------------|
| Sample in FACS tube             | On ice      |
| DAPI                            | On ice      |
| Post Hyb Resuspension Buffer    | On ice      |
| LB 1.5ml tube to facs sort into | RT          |

- Record each unstained sample
- Add 100ul Post Hyb Resuspension Buffer into LB 1.5ml tube for sample collection
- Stain each sample with 5ul DAPI solution, incubate a few minutes on ice
- Start sorting of DAPI-positive nuclei
- After sort, spin each collection tube 10min at 850g at 4C
- Remove supernatant, leave ~80ul behind

#### **Stage 7: Chromium loading**

- Proceed with 10X User Guide, CG000691
- Count nuclei and determine concentration according to 10X loading table
- Prepare 10X MasterMix and Chip for Chromium run and proceed with library prep according to manufacturer's protocol
